# Polycystic Kidney Disease in the Medaka (*Oryzias latipes*) pc Mutant Caused by a Mutation in the Gli-Similar3 (*glis3*) Gene

Hisashi Hashimoto<sup>1,2\*</sup>, Rieko Miyamoto<sup>1,2</sup>, Naoki Watanabe<sup>1,2</sup>, Dai Shiba<sup>3</sup>, Kenjiro Ozato<sup>1</sup>, Chikako Inoue<sup>1</sup>, Yuko Kubo<sup>2</sup>, Akihiko Koga<sup>2</sup>, Tomoko Jindo<sup>4</sup>, Takanori Narita<sup>4</sup>, Kiyoshi Naruse<sup>4</sup>, Kazuko Ohishi<sup>5</sup>, Keiko Nogata<sup>5</sup>, Tadasu Shin-I<sup>5</sup>, Shuichi Asakawa<sup>6</sup>, Nobuyoshi Shimizu<sup>6</sup>, Tomotsune Miyamoto<sup>7</sup>, Toshio Mochizuki<sup>7</sup>, Takahiko Yokoyama<sup>3</sup>, Hiroshi Hori<sup>2</sup>, Hiroyuki Takeda<sup>4</sup>, Yuji Kohara<sup>5</sup>, Yuko Wakamatsu<sup>1,2</sup>

**1** Bioscience and Biotechnology Center, Nagoya University, Nagoya, Japan, **2** Graduate School of Science, Nagoya University, Nagoya, Japan, **3** Department of Anatomy and Developmental Biology, Kyoto Prefectural University of Medicine, Kyoto, Japan, **4** Graduate School of Science, The University of Tokyo, Tokyo, Japan, **5** Center for Genetic Resource Information, National Institute of Genetics, Mishima, Japan, **6** Department of Molecular Biology, Keio University School of Medicine, Tokyo, Japan, **7** Second Department of Medicine, Hokkaido University Graduate School of Medicine, Sapporo, Japan

## Abstract

Polycystic kidney disease (PKD) is a common hereditary disease in humans. Recent studies have shown an increasing number of ciliary genes that are involved in the pathogenesis of PKD. In this study, the Gli-similar3 (*glis3*) gene was identified as the causal gene of the medaka pc mutant, a model of PKD. In the pc mutant, a transposon was found to be inserted into the fourth intron of the *pc/glis3* gene, causing aberrant splicing of the *pc/glis3* mRNA and thus a putatively truncated protein with a defective zinc finger domain. *pc/glis3* mRNA is expressed in the epithelial cells of the renal tubules and ducts of the pronephros and mesonephros, and also in the pancreas. Antisense oligonucleotide-mediated knockdown of *pc/glis3* resulted in cyst formation in the pronephric tubules of medaka fry. Although three other *glis* family members, *glis1a*, *glis1b* and *glis2*, were found in the medaka genome, none were expressed in the embryonic or larval kidney. In the pc mutant, the urine flow rate in the pronephros was significantly reduced, which was considered to be a direct cause of renal cyst formation. The cilia on the surface of the renal tubular epithelium were significantly shorter in the pc mutant than in wild-type, suggesting that shortened cilia resulted in a decrease in driving force and, in turn, a reduction in urine flow rate. Most importantly, EGFP-tagged pc/*glis3* protein localized in primary cilia as well as in the nucleus when expressed in mouse renal epithelial cells, indicating a strong connection between pc/*glis3* and ciliary function. Unlike human patients with *GLIS3* mutations, the medaka pc mutant shows none of the symptoms of a pancreatic phenotype, such as impaired insulin expression and/or diabetes, suggesting that the pc mutant may be suitable for use as a kidney-specific model for human *GLIS3* patients.

**Citation:** Hashimoto H, Miyamoto R, Watanabe N, Shiba D, Ozato K, et al. (2009) Polycystic Kidney Disease in the Medaka (*Oryzias latipes*) pc Mutant Caused by a Mutation in the Gli-Similar3 (*glis3*) Gene. PLoS ONE 4(7): e6299. doi:10.1371/journal.pone.0006299

**Editor:** Mary C. Mullins, University of Pennsylvania School of Medicine, United States of America

**Received:** January 29, 2009; **Accepted:** June 9, 2009; **Published:** July 17, 2009

**Copyright:** © 2009 Hashimoto et al. This is an open-access article distributed under the terms of the Creative Commons Attribution License, which permits unrestricted use, distribution, and reproduction in any medium, provided the original author and source are credited.

**Funding:** This work was supported by a Grant-in-Aid from the Ministry of Education, Science, Sports, Culture, and Technology (MEXT) of Japan to H. H. (No. 17770190) and Y. W. (No. 18390248); the president's discretionary fund at Nagoya University; and grants from The Takeda Science Foundation (<http://www.takeda-sci.or.jp/>), Uehara Memorial Foundation (<http://www.ueharazaidan.com/>) and Novartis Foundation (Japan) for the Promotion of Science (<http://novartisfound.or.jp/>). The funders had no role in study design, data collection and analysis, decision to publish, or preparation of the manuscript.

**Competing Interests:** The authors have declared that no competing interests exist.

\* E-mail: hsshsm@bio.nagoya-u.ac.jp

## Introduction

Polycystic kidney disease (PKD) is a common heritable kidney condition in humans. It is characterized by the appearance of fluid-filled cysts in the renal tubules and collecting ducts of the kidney, with pleiotropic lesions sometimes occurring in other organs, such as the liver, the retina and the pancreas (reviewed in [1]). Recent studies have proposed that renal cilia, which are immotile organelles projecting from the renal epithelium into the lumen of the nephric tubule or duct, play a crucial role in cyst formation. Animal models such as *Tg737<sup>orbk</sup>* and *Kif3a* mutant mice, which have atypically structured cilia in the renal tubule, have cystic kidneys (reviewed in [2]), suggesting that normally structured renal cilia are required for the maintenance of tubular

lumen morphology. Mutations in *PKD1* and *PKD2*, which encode polycystin-1 and polycystin-2, respectively, are responsible for most cases of PKD in humans [3,4]. Both polycystins localize in the primary cilia and evoke cellular responses to mechanostimuli of cilia, such as an increase in cytoplasmic Ca<sup>2+</sup> [5,6]. These findings imply that primary cilia bearing the polycystin-1/-2 complex function as mechanosensors of renal flow, sensing the rate of flow and thereby initiating the ciliary signal, which gives rise to the cellular response and the regulation of lumen size [7,8]. Previous reports have suggested that PKD pathogenesis is associated with aberrant cell proliferation as well as altered planar cell polarity in the renal tubular and ductal epithelium [2,9–12].

Studies of zebrafish and medaka PKD mutants have revealed that the ciliary beating motion is required on the surface of the

renal epithelium for the generation of urine flow in the pronephric duct [13,14]. In addition, in fish, a low urine flow rate is thought to lead to cyst formation. The role of the cilia in PKD pathogenesis differs in fish and mammals: the cilia in fish are motile and actively induce urine flow, whereas in mammals, the cilia merely serve as passive sensors of urine flow.

The medaka *pc* mutant is a piscine mesonephric model of PKD [15], meaning that the mutant develops typical PKD symptoms such as swollen renal tubules, fluid-filled cysts, and abdominal enlargement, all of which are inherited in an autosomal and recessive manner. The PKD phenotype in the *pc* mutant becomes histologically apparent soon after the completion of pronephric development (several days after hatching). As the mesonephros develops, the condition becomes more apparent, and, by the end of the animal's life, the abdomen has become severely distended. Although our previous findings revealed that *pc* mutants have cilia on the surface of the renal tubular epithelium, we did not determine whether these cilia are normal in terms of structure and motility [15]. While PKD patients and other animal models are known to have multiple disorders in which organs other than the kidney are affected, including retinal degeneration, hepatic fibrosis, *situs inversus*, and cystic disease in the pancreas or the liver [11,12], medaka *pc* mutants do not develop notable pleiotropic lesions in addition to PKD. Given that PKD is a late-onset condition that progresses at a moderate rate in *pc* mutants, the medaka *pc* mutant has a relatively long life when compared with zebrafish pronephric models of cystic kidney, such as *vHnf1*, *double bubble*, and *oval (polaris/IFT88/osm-5)* mutants [16–23]. The combined features of the medaka *pc* mutant show that it is a good clinical model of the human form of the disease.

In this study, we identified Gli-similar 3 (*glis3*) as the causal gene of the *pc* mutant by positional cloning. Human *GLIS3* was recently identified as the gene responsible for a neonatal diabetes syndrome associated with congenital hypothyroidism, congenital glaucoma, hepatic fibrosis and polycystic kidneys [24]. Here we provide evidence that clearly indicates that a mutation in the *pc/glis3* gene causes PKD in medaka. Our data suggest that *pc/glis3* is involved in the renal ciliary function that is required for the production of urine flow and maintenance of the size of the renal tubular lumen.

## Materials and Methods

### Fish

The medaka *pc* mutant was first isolated by Dr. Hideo Tomita at Nagoya University [15] and has been maintained in a homozygous state over many generations (*pc* homozygotes develop into adults and are able to produce offspring). The *pc* homozygotes were crossed with the HNI-I strain [25], which is an inbred strain originating from a medaka population in northern Japan [26], and the resulting F1 generation was sib-mated to produce an F2 generation. A total of 847 F2 homozygotes were collected for locus mapping.

The developmental stages assigned to medaka are the same as those described elsewhere [27].

During experiments, medaka were handled in accordance with the Regulations for Animal Experiments in Nagoya University.

### Positional cloning

The linkage group within which the *pc* locus is located was determined using the M-marker system developed by Kimura et al. [28]. The BAC library constructed by Matsuda et al. [29] was used for chromosome walking. Four sequential BAC clones, 184A3, 198E6, 201K4, and 174E15 were isolated to span the area from the AU171175 marker to the *pc* locus. STS markers were

identified from the end sequence of each BAC clone. More detailed information on the markers used is available on request.

### cDNA cloning of Glis family members and other genes

cDNAs were cloned by RT-PCR with primers designed on the basis of information in the medaka genome database ([http://www.ensembl.org/Oryzias\\_latipes/](http://www.ensembl.org/Oryzias_latipes/)) [30]. Cloned cDNA sequences have been deposited in the DDBJ database under the following accession numbers: *pc/glis3*, AB353137; *pc/glis3* short form, AB353138; *glis1a*, AB353139; *glis1b*, AB353140; *glis2*, AB353141. The *insulin* cDNA (AB257292) was isolated as described by Ogoshi et al. [31].

### In situ hybridization

A digoxigenin-labeled riboprobe was made from a cloned cDNA template using SP6 or T7 RNA polymerase after restriction enzyme digestion. In situ hybridization was performed as previously described [32]. To assess kidney staining, larvae were fixed by 4% Paraformaldehyde in PBS and the internal organs (gut, heart, liver, spleen, and reproductive organs), except for the kidneys, were removed through the abdomen before the previously described procedures.

### Histology

Paraffin sections were produced as previously described [33].

After *in situ* hybridization, the specimens were dehydrated in acetone, embedded in Technovit 8100 (Heraeus, Werheim, Germany) and sectioned. The cell nuclei were counterstained with 1% neutral red.

### Gene knockdown

Gene knockdown was performed by microinjection of antisense oligonucleotides into a one- or two-cell-stage embryo. The GriPNA antisense oligonucleotides used in this study were *pc-ATG-1* (5'-CACTCATGTCTAAAACGG-3'), *pc-ATG-2* (5'-AC-TAAACATGGACTGTGT-3') and *pc-SPD* (5'-CAGATG-TACCGAGCATTT-3') (Active Motif, Tokyo, Japan). Each oligonucleotide was injected at a concentration of 1 ng per embryo.

### Fluorescent dye injection

Urine excretion assays were performed as previously described [13]. A 5% rhodamine-conjugated dextran (molecular weight: 10,000 Da; Molecular Probes) solution was injected into the common cardinal vein of 10-day postfertilization (dpf) fry anesthetized with 0.2 mg/ml tricaine (Sigma, Missouri, USA). Urine flow was observed under a stereoscopic microscope until the fluorescence reached the urinary bladder, or until the time following administration exceeded 30 min.

### Antibody staining and measurement of renal cilia length

The cilia of the hatchlings were subjected to length measurement. To avoid the segmental variation of the ciliary length, only the tubular segment of the pronephros was analyzed in comparison between the wild-type and the *pc* mutant. The samples were fixed in the same method as *in situ* hybridization. The primary cilia were visualized with anti-acetylated alpha-tubulin antibody (T6793, Sigma) and anti-rabbit IgG-FITC (81–6111; Zymed Laboratories, California, USA). Images of the cilia were obtained using a confocal fluorescence microscope (FV-1000, Olympus, Japan). Cilia length was determined by measuring at least 15 cilia for each individual using Image J 1.32j software (National Institute of Health). Only cilia that were clearly captured

in fluorescence images and which had obvious ends (tip and root) were used for measurements.

### Detection of proliferating cells

Medaka embryos at 4 dpf (stage 30) and fry at 5-day posthatching (dph) were exposed to 10 mM BrdU (Roche Diagnostics, Basel, Switzerland) for 24 h. Embryos were dechorionated with hatching enzyme prior to exposure [34]. The embryos and fry were sliced into 5- $\mu$ m sections after fixation in Bouin's solution. Cells that had incorporated BrdU were detected immunohistochemically with anti-BrdU mouse monoclonal antibody (Roche Diagnostics), anti-mouse IgG HRP and diaminobenzidine (DAB). The number of BrdU-positive cells was counted in each section taken from the whole kidney of 4 dpf embryos and in each of 15 sections taken from the most anterior region of the pronephros at 5 dph.

### Subcellular localization assay of the *pc/glis3* protein

Full-length *pc/glis3* cDNA was inserted into the BamHI site of the pCS3-MT vector [35], and EGFP cDNA was subcloned into the EcoRI/XhoI site to tag the C-terminus of the *pc/glis3* protein. The resultant vector was transfected into a mouse renal epithelial cell line (Dai1 cells) [36] to examine the sub-cellular localization of the GFP-tagged *pc/glis3* protein. Cells were cultured on glass coverslips coated with human collagen IV (50 mg/ml) at 33°C. Sub-confluent cells were incubated overnight in 1000  $\mu$ l of culture medium to which 50  $\mu$ l of serum-free medium containing 5  $\mu$ l of Gene juice (Novagen, Darmstadt, Germany) and 0.5  $\mu$ g of the cDNA expression construct was added per well. After primary cilia were formed, cells were fixed in ice-cold methanol/acetone [1:1] for 10 min, permeabilized in 0.1% Triton X-100 for 20 min and quenched in PBS (137 mM NaCl, 2.6 mM KCl, 6.5 mM Na<sub>2</sub>HPO<sub>4</sub>, and 1.5 mM KH<sub>2</sub>PO<sub>4</sub>) containing 1% BSA for 1 h at room temperature. Cells were then incubated with mouse anti-acetylated alpha-tubulin antibody (clone 6-11B-1) [1:2000] at room temperature for 2 h. Cells were washed in PBS and incubated with Alexa555-conjugated goat anti-mouse IgG for 1 h. Fluorescence was visualized with an IX70 microscope (Olympus, Tokyo, Japan). Digital images were processed by MetaMorph (Molecular Devices, Downingtown, PA, USA).

## Results

### The *pc* locus encodes a medaka ortholog of *GLIS3* (Gli-similar3)

In order to map the *pc* locus, we generated a total of 847 F2 siblings from crosses between *pc* mutants and an inbred strain with a different genetic background (HNI). First, by bulked segregation analysis using the M-marker system [28], we mapped the *pc* locus to linkage group 12 (LG12), before constructing a high-resolution recombination map around the *pc* locus using known polymorphic DNA markers on LG12. We found that the marker AU171175 was closest to the *pc* locus, with just nine recombination events (9/1694) occurring between them (Fig. 1A).

We then used BAC walking to construct a physical map with BAC clones that covered the *pc* locus. Precise recombination analysis revealed that BAC clone 174E15 contained the *pc* locus (Fig. 1B). This BAC clone was sequenced using the shotgun method [30].

Using the Genscan program, we found that BAC clone 174E15 contained five genes (Fig. 1C). Using additional recombination analysis using sequence-tag sites, we narrowed the *pc* locus region down to a 127 kb fragment containing only two genes, which were medaka orthologs of *GLIS3* and *RFX3*. We examined the mRNA

expression of these two genes in the kidneys of wild-type and *pc* mutant medaka using RT-PCR. One of several primer sets for the *glis3* ortholog PCR-amplified a fragment in wild type but not in *pc* mutant kidney (Fig. S1A). Northern blot analysis using a fragment of *glis3* cDNA revealed *pc/glis3* mRNA in wild-type but not in *pc* mutant kidney (Fig. S1B), suggesting that *glis3* has a high likelihood of being the *pc* gene. We did not find any mutations in the *RFX3* gene or cDNA (data not shown).

### *glis3* mRNA in *pc* mutants lacks part of the zinc-finger-encoding region

We isolated medaka *pc* cDNA from wild-type kidney by RACE PCR and determined the ORF sequence (Fig. 1D). The predicted amino acid sequence contained five C2H2-type zinc fingers that most closely resembled those of the mammalian GLIS family, which is closely related to the Gli and Sox families (Fig. S2). The *pc/glis3* protein had 53% and 51% homology to human and mouse GLIS3, respectively.

We identified two *pc/glis3* mRNA variants in medaka kidney (Fig. 1D). The third exon of the *pc/glis3* gene was alternatively spliced to produce two different mRNAs with two different presumptive start codons (AB353137, AB353138), and thus, two different putative proteins (783 and 585 amino acids). Both forms were detected at all developmental stages and in all tissues examined (data not shown).

In the *pc* mutant, the 3' region of the *pc/glis3* transcript was replaced by several different sequences, possibly resulting from alternative splicing of a common genomic region (Fig. 1E and Fig. S3). On the basis of the cDNA sequences, we predicted that the resulting defective *glis3* products had a normal N-terminal domain and one intact zinc finger, but that they lacked a normal C-terminal domain including the other four zinc fingers (Fig. 1G). Further analyses of the *pc* mutant genome revealed that intron 4 in the *pc* mutant contains an insertion consisting of a transposon-like sequence which has ends that are similar to those found in the medaka *rs-3* mutant (Fig. 1F and Fig. S4)[37]. The medaka *rs-3* mutant, in which scales are lost from the body surface, has been shown to have a transposon in the first intron of the ectodysplasin-A receptor, which causes a splicing defect. Similarly, in the *pc* mutant, the insertion is transcribed and spliced to produce aberrant *pc/glis3* mRNA encoding a defective *glis3* protein lacking a complete zinc finger domain and C-terminus (Fig. S5).

### *pc* mRNA exists in the renal epithelial cells of the pronephros and mesonephros

Development of the pronephros in medaka becomes histologically apparent at the mid-somite stages (stage 25) when the pronephric duct can be first recognized. This stage is followed by development of the tubule at stage 31, and the glomus at stage 35 (Fig. 2N) [33]. By 5 dph, the tubular segment has formed multiple loops and, thereafter, mesonephric nephrons start to appear around the loops.

We examined *pc/glis3* mRNA expression during kidney development in medaka using *in situ* hybridization. *pc/glis3* transcripts were first detected at stage 27 (24-somite stage) in part of the developing duct of the pronephros (Fig. 2A, F) and in the anterior part of the developing foregut, which had an obvious lumen (Fig. 2A, E). At stage 30 (35-somite stage), the entire length of the developing duct was positive for *pc/glis3* mRNA (Fig. 2B), but no expression was detected in the tubular region. Sectioning revealed that the positive signal localized specifically in the renal epithelia of ducts, in the tissue facing the lumen (Fig. 2F). The tubular segment that connects the duct with the forming

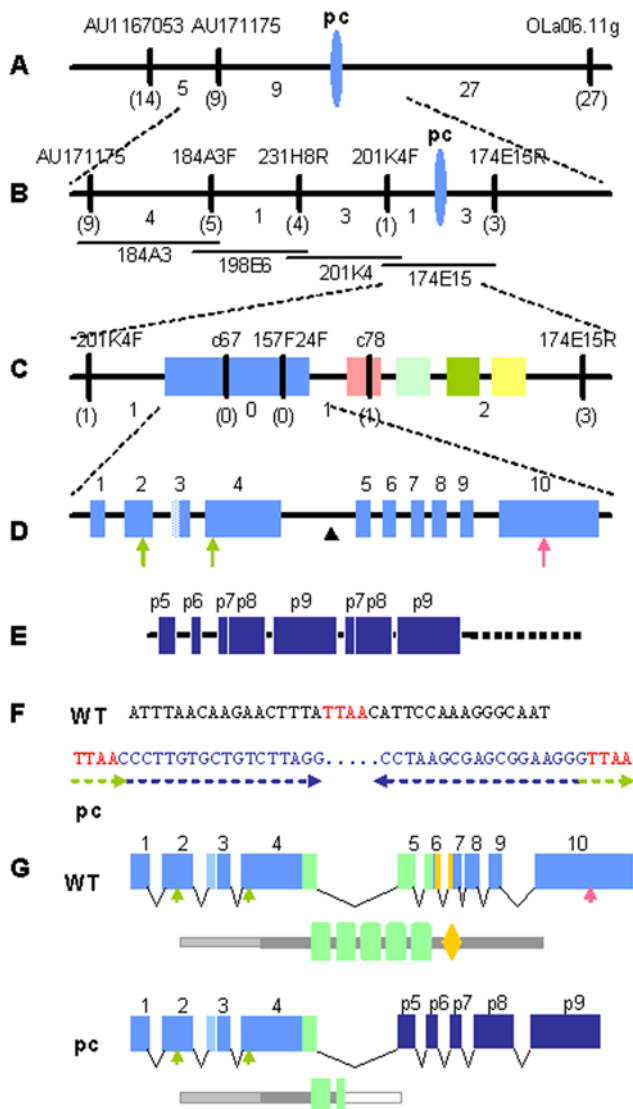

**Figure 1. Positional cloning of the *pc* gene.** (A) High-resolution recombination map around the *pc* locus on LG12. Numbers under the bar indicate the number of recombination events that occurred between neighboring markers. Numbers in parentheses show the number of recombinants found for the marker above the bar (among 1694 meiotic events). (B) BAC contig covering the *pc* locus. Physical mapping positioned the *pc* locus between the two markers 201K4F and 174E15R. The BAC MF001SSA174E15 contains the *pc* locus. (C) Distribution of genes predicted by Genscan. The 174E15 BAC insertion was sequenced using the shotgun method. Five genes, similar to *glis3* (blue), *RFX3* (pink), *SMAD4* (light green), *BMP10* (green) and *catenin arvcf-2ABC* (yellow), respectively, were predicted in this region. (D) Structure of the *pc/glis3* gene. The *pc/glis3* gene consists of 10 exons, with the third exon alternatively spliced to produce two different mRNAs with two different presumptive start codons. The positions of the start and the stop codons are indicated by arrows below the diagram of the gene structure. The arrowhead indicates the insertion point (5261/5726). (E) Structure of the insertion in the *pc* mutant. By comparing the sequences of the *pc* mutant cDNA and the *pc* genome, regions behaving as exons were identified for the *pc* locus. Three exonic sequences, p7, p8 and p9, were found at least twice in the *pc* mutant mRNA. In the *pc* genome, this fragment was found in the interstitial region indicated by the arrowhead in (D). The sequence of the 3' region of the insertion (dotted line) is unknown. (F) Sequence of the insertion point at the *pc* locus. A transposon-like sequence (>10 kb) was inserted into the fourth intron (3' to the 5261 nucleotide of the 5726 bp intron). Like the insertion in the medaka *rs-3* mutant, this insertion in the *pc*

mutant contained 18 bp inverted repeats (blue) with 4 bp (TTAA in orange) duplications at the ends. Internal sequences of approximately 300 bp, with homology to the *rs-3* transposon, were found adjacent to the 18 bp repeats at both ends (AB491224, AB491225). The arrowhead indicates the insertion point (WT) and the boundary of the transposon-like insertion and the innate sequence (*pc*). The other internal region of the insertion (>10 kb) is shown as a dotted line. (G) Predicted structures of WT and mutant *pc* mRNAs and proteins. The structures of mRNA (upper) and protein (lower) are shown for the WT and *pc* mutants. WT mRNA is transcribed from 10 exons. The third exon is alternatively spliced (light blue). The *pc* mutant mRNA lacks the 3' region corresponding to exons 5–10. Instead, it has a different 3' tail that is specific to the *pc* mutant (dark blue). The regions depicted in light green and orange indicate the sequences encoding the zinc fingers and the nuclear localization signal, respectively. The other exons are depicted in blue. Alternative splicing of exon 3 appeared to produce two distinct N-terminal domains, with the short form lacking the light-colored N-terminus. Zinc fingers are depicted as green boxes. The *pc* mutant protein lacks part of the second zinc finger motif and all three zinc fingers thereafter. The diamond-shaped region indicates a predicted nuclear localization signal. Other regions of the *pc/glis3* protein are colored gray. The white box of the *pc* mutant protein corresponds to the amino acids produced from the *pc* insertional sequence.

doi:10.1371/journal.pone.0006299.g001

pronephric glomus started to express *pc/glis3* mRNA from stage 32 (somite-completion stage) (Fig. 2C, G, N). At stage 35 (when formation of the pronephros is completed) this tubular segment stained more strongly for *pc/glis3* than the duct (Fig. 2D). After hatching, *pc/glis3* mRNA expression was maintained in the renal tube structures, the tubule, and the duct (Fig. 2H, I, L, M, N). Beginning at 10 dph, mesonephric nephrons develop mostly in the tissue surrounding the pronephric tubule (the anterior portion of the pronephros) [33] and thus, accordingly, *pc/glis3*-positive mesonephric tubules were visualized mainly in the anterior field of the kidney (Fig. 2J, K).

In the *pc* mutant, despite the abnormal 3' region, *pc/glis3* mRNA was expressed as in wild-type medaka (Fig. 2O–T). In situ hybridization using the 5' region or the transposon-derived region as a probe revealed that the expression pattern of *pc/glis3* was normal in the *pc* mutant (Fig. 2O). Transcripts were undetectable in mutants when a wild-type 3' probe was used (data not shown). At all stages examined, the *pc* mutants exhibited positive staining in the renal epithelial cells (Fig. 2O–R and data not shown). Subsequently, when dilation of the renal tube structures had been initiated (5 dph), *pc/glis3* mutant mRNA expression was observed in a thin layer of the epithelial cells lining the enlarged lumen (Fig. 2S, T).

These observations show that the *pc/glis3* expression domain is consistent with manifestation of the *pc* phenotype, supporting our hypothesis that *pc/glis3* is the causal gene of the *pc* mutation.

### Knockdown of *pc/glis3* results in pronephric cyst production

To confirm that the *glis3* gene is involved in PKD, we explored whether antisense-directed knockdown of *glis3* led to cyst formation. A series of antisense oligonucleotides, which targeted the two alternative start codons (*pc*-ATG-1, -2) and the fourth splicing donor site (*pc*-SPD), were designed. Medaka hatchlings that had been treated with the antisense oligonucleotides had severe dilation (4/12) of the pronephric tubule and/or duct (Fig. 3A, B), and sometimes of Bowman's capsule (Fig. 3C). The diameter of the lumen in knockdown fry was 3–4 times larger than in wild-type fry (Fig. 3D). No marked differences were apparent in the knockdown effects of the three antisense oligonucleotides, and

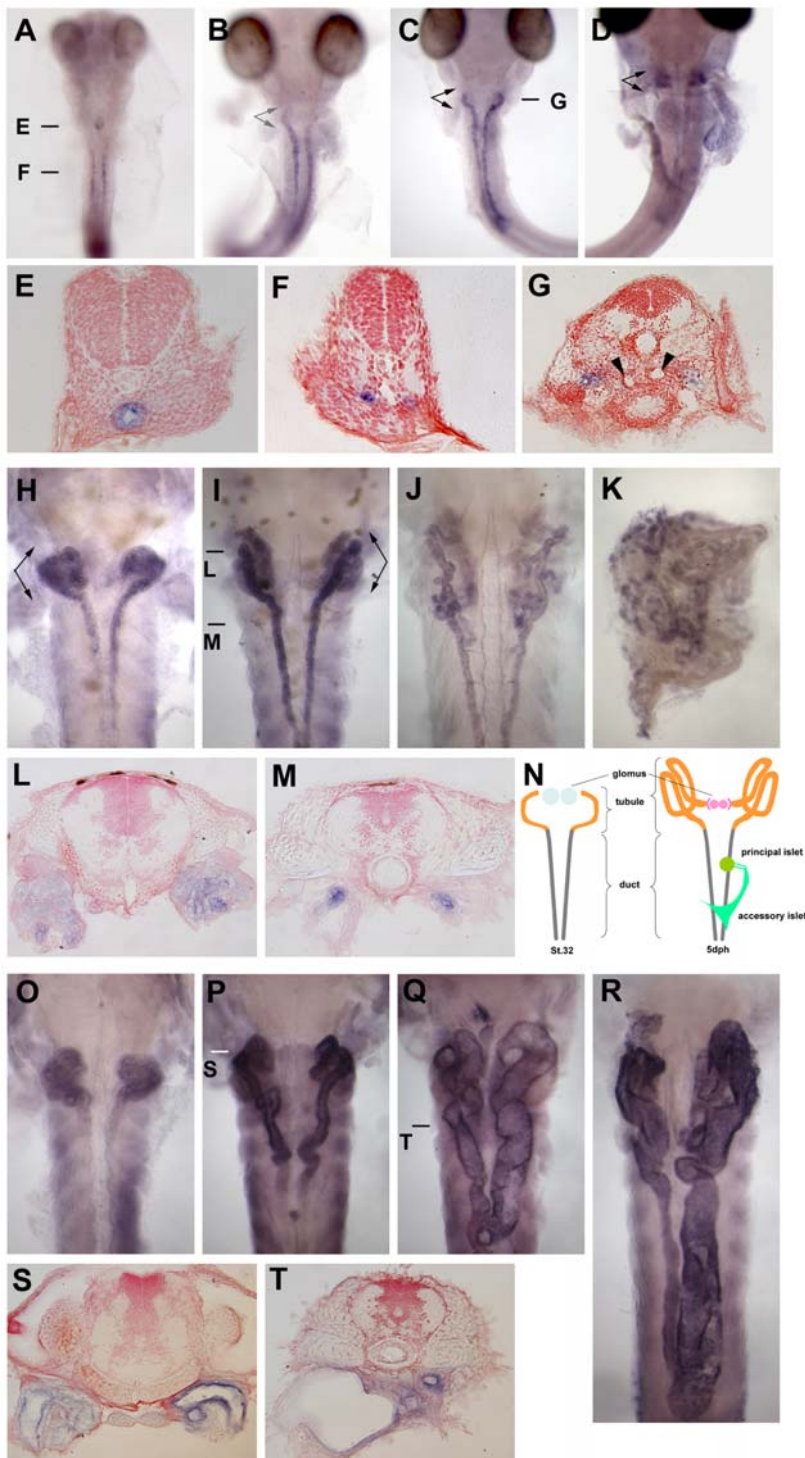

**Figure 2. *pc/glis3* expression in medaka kidney.** The expression pattern of *pc/glis3* mRNA in embryonic kidney of wild-type orange red medaka is shown for larvae of (A) stage 27, (B) stage 30, (C) stage 32, and (D) stage 35. In sections (E) and (F) (stage 27) and (G) (stage 32), *pc/glis3*-positive cells can be observed in the epithelium of the gut, the renal duct, and the renal tubule, respectively. Arrowheads in (G) indicate the pronephric glomus. *pc/glis3* expression in larval kidney of wild-type medaka is shown for (H) the hatching stage, (I) 5 days posthatching (dph), (J) 10 dph, (K) 20 dph, and (L, M) sections of the 5 dph fry in (I). In (N), segments of the kidney and the pancreas at stage 32 (left) and at 5 dph (right), are shown [33]. At stage 32, developing pronephric glomerula (blue) are located most anteriorly, followed by the pronephric tubules (orange) and ducts (gray). The pronephric tubules and glomerula develop after the pronephric ducts have formed [33]. By 5 dph, the pronephric glomerula (pink) and tubules (orange) have become mature. The pancreatic principal (green) and accessory (dark green) islets can be visualized by in situ hybridization with *insulin*. Expression of mutant *pc/glis3* mRNA in *pc* mutant kidney is shown for (O) the hatching stage, (P, Q) 5 dph, (R) 10 dph, and (S, T) 5 dph. The *pc* mutant individual shown in (Q) and (T) has more severe dilation of the renal tubules and ducts than that in (P) and (S). Arrows in (B), (C), (D), (H), and (I) indicate the positions of tubular segments. Bars in (A), (C), (I), (P) and (Q) indicate the positions of the sections shown in (E), (F), (G), (L), (M), (S) and (T). The sections were stained with neutral red to visualize the cell nuclei.  
doi:10.1371/journal.pone.0006299.g002



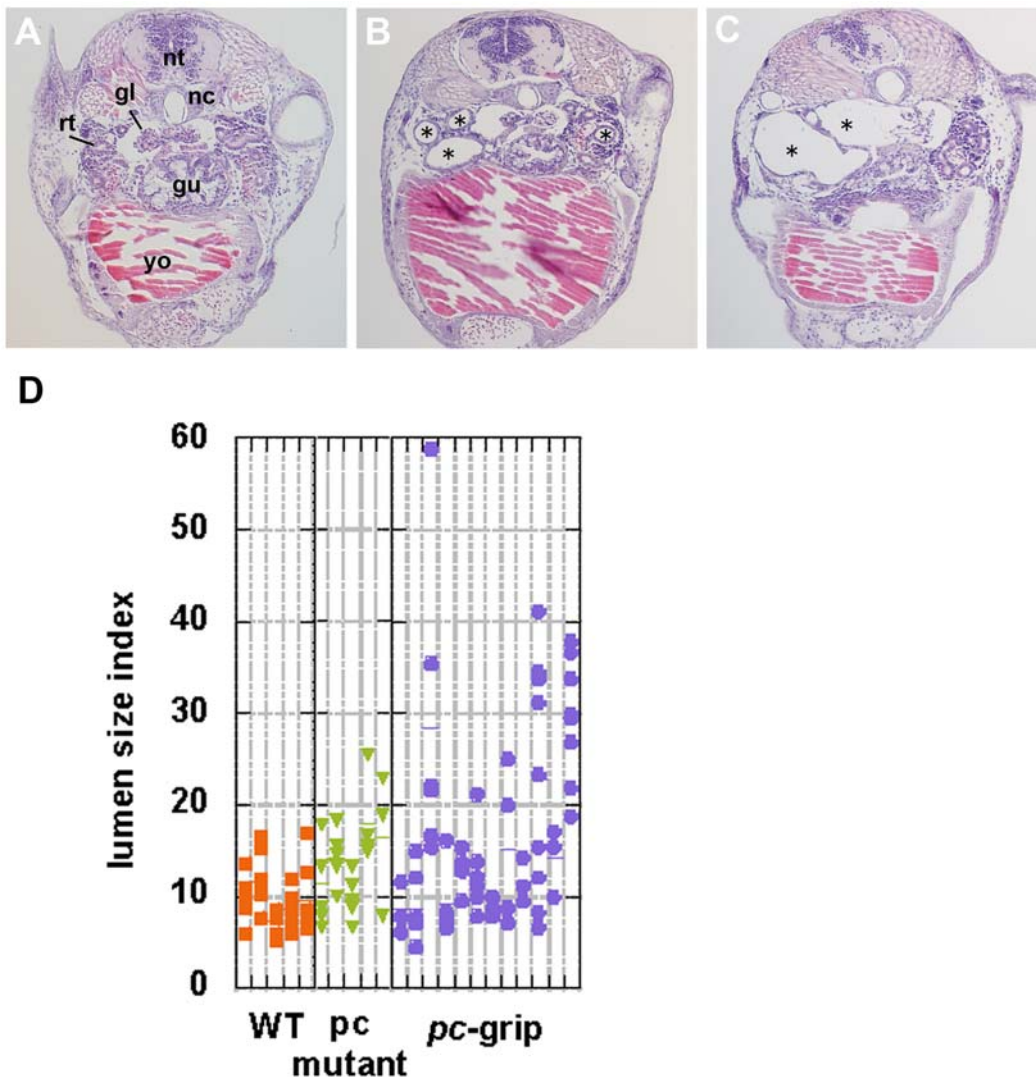

**Figure 3. Cyst formation in *pc/glis3* knockdown individuals.** Gene-specific knockdown with antisense oligonucleotides resulted in dilation of the renal tubules (B), ducts (not seen in this figure), and glomera (C). In (A), a cross section of a hatching fry with no notable dilation is shown. gl, glomus; gu, gut; nc, notochord; nt, neural tube; rt, renal tubule; yo, yolk. Typical dilation of the tubule is indicated by a star (B, C). The size of the lumen of the renal tubule was measured and is presented as a lumen size index (D). The lumen size index was defined as being a perpendicular bisector of the greatest tubule diameter of the lumen in a section. This was done in order not to overestimate the lumen size in the event that the lumen was sectioned at a right angle or the lumen shape was oval. Mean lumen size index values are indicated by a horizontal bar and measurements were taken for several sections of the tubule (arrows in Fig. 2H) at locations where the glomus was observed in the hatchlings. The lumen size indices for each individual are shown in a single lane, with individual dots in each lane representing the lumen size index value of a single tubular section. Results from knockdown with *pc-grip* (*pc-SPD*) in wild-type medaka as well as from *pc* mutants are shown. Compared to untreated wild-type medaka, the lumen size index in *pc/glis3*-knockdown fry is significantly higher ( $p < 0.005$ ). doi:10.1371/journal.pone.0006299.g003

the renal phenotypes of the knockdown and *pc* mutant fry were relatively similar. The findings indicated that *pc/glis3* is involved in PKD and that the mutation in *pc* mutants, which leads to the truncation of some zinc fingers and the C-terminus, results in a loss of function in the *pc/glis3* protein. Our observation that some of the knockdown fry exhibited more severe and earlier onset dilation of the renal tubules than *pc* mutants implies that the mutation in *pc* mutants may be a hypomorphic allele.

#### Medaka *glis3* expression in the pancreas

For comparison between species, we examined expression of the *pc/glis3* gene using in situ hybridization. In medaka fry, the *pc/glis3* gene was expressed in the pancreas. The distribution of *pc/glis3*-

positive cells was similar to the distribution of *insulin*-positive cells (Fig. 4A, B, C, G, H, I), implying that, like the human *GLIS3* gene, the medaka *glis3* gene might cause pancreatic defects. However, pancreatic *insulin* expression was not affected in the *pc* mutant (Fig. 4D, E, F).

#### Other *glis* family members in medaka

In humans and mice three *GLIS* family genes, *GLIS1*, *GLIS2*, and *GLIS3*, have been found [24,38–41]. A search for genes belonging to the *GLIS* family in the medaka genome revealed four genes, the cDNA sequences of which were used to construct a phylogenetic tree with clustalW (Fig. S2). The tree revealed that medaka have two copies of *glis1*, one copy of *glis2*, and one copy of

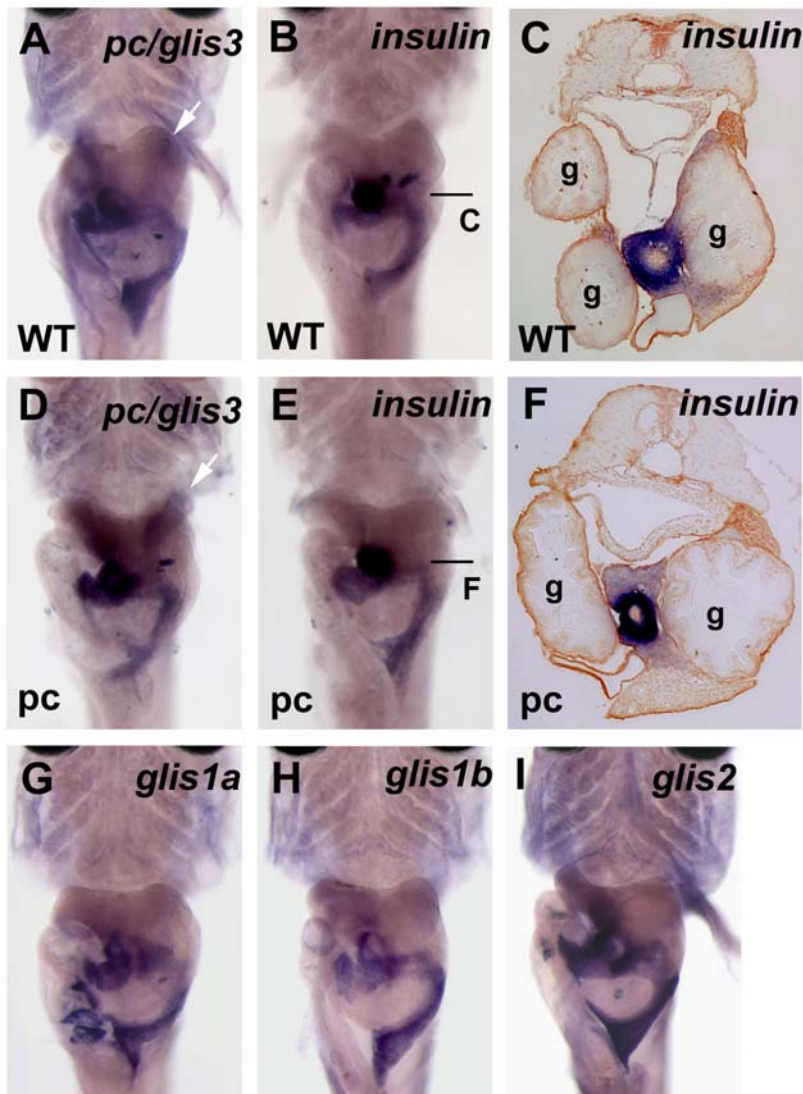

**Figure 4. *pc/glis3* expression in the medaka pancreas.** In situ hybridization was performed using 5-day posthatching fry with intact internal organs. Compared with Fig. 2N, the principal and accessory islets of the pancreas can be easily seen to be positive for the expression of all genes shown. The pancreas often varies in shape. White arrows indicate staining in the renal tubules. Arrowheads indicate the principal islets. (A, B, C) wild-type. (D, E, F) *pc* mutant. (A, D) *pc/glis3*, (B, C, E, F) *insulin*, (G) *glis1a*, (H) *glis1b*, and (I) *glis2* expression was detected. (A, B, D, E, G, H, I) ventral view. The principal islet sections show that there is no apparent difference in the number of *insulin*-positive cells (C, F). doi:10.1371/journal.pone.0006299.g004

*glis3* (*pc*). We then examined the expression of each *glis* gene using in situ hybridization and found that all of the *glis* genes including *pc/glis3* were expressed in the pancreas of medaka fry, and that the cells in which *glis* expression occurred overlapped with the distribution of *insulin*-positive cells. In contrast, none of the *glis* genes other than *pc/glis3*, was detected in the kidney (pronephros) of medaka fry (Fig. 4A, D).

#### Impaired urine flow rate and shortened renal cilia in the *pc* mutant

In numerous PKD models, pathological features are attributed to the absence of cilia or kidney dysfunction [2]. Since the ciliary defects in some zebrafish and medaka PKD models are manifested as impaired urine flow rate [13], we performed dye excretion experiments to determine whether pronephric urine flow was normal in *pc* mutants. Rhodamine-conjugated dextran was injected into the common cardinal vein of living 1-day old fry

(10 dpf), and was observed to be filtered in the pronephric glomus and excreted via the pronephric ducts into the urinary bladder. The time after injection before the urine first became visible in the bladder was  $153.0 \pm 14.7$  s in wild-type fry (Fig. 5). In the *pc* mutant, the corresponding time was significantly longer ( $348.0 \pm 164.9$  s). The delay in the dye reaching the bladder was not due to decreased blood circulation, because the heart rate of the *pc* mutants was comparable to that of wild-type individuals (approximately 90 beats per minute). In addition, the lumens of the pronephric tubules and ducts in *pc* mutants and wild-type individuals were the same size (Fig. 5G, H), suggesting that the reduction in urine flow rate was not due to dilation of the tubules or ducts.

To investigate why the urine flow decreased in *pc* mutants, we examined the motility of renal cilia. In kidneys from the *pc* mutants, the cilia beat in a circular motion with a constant frequency (data not shown) that was indistinguishable from that

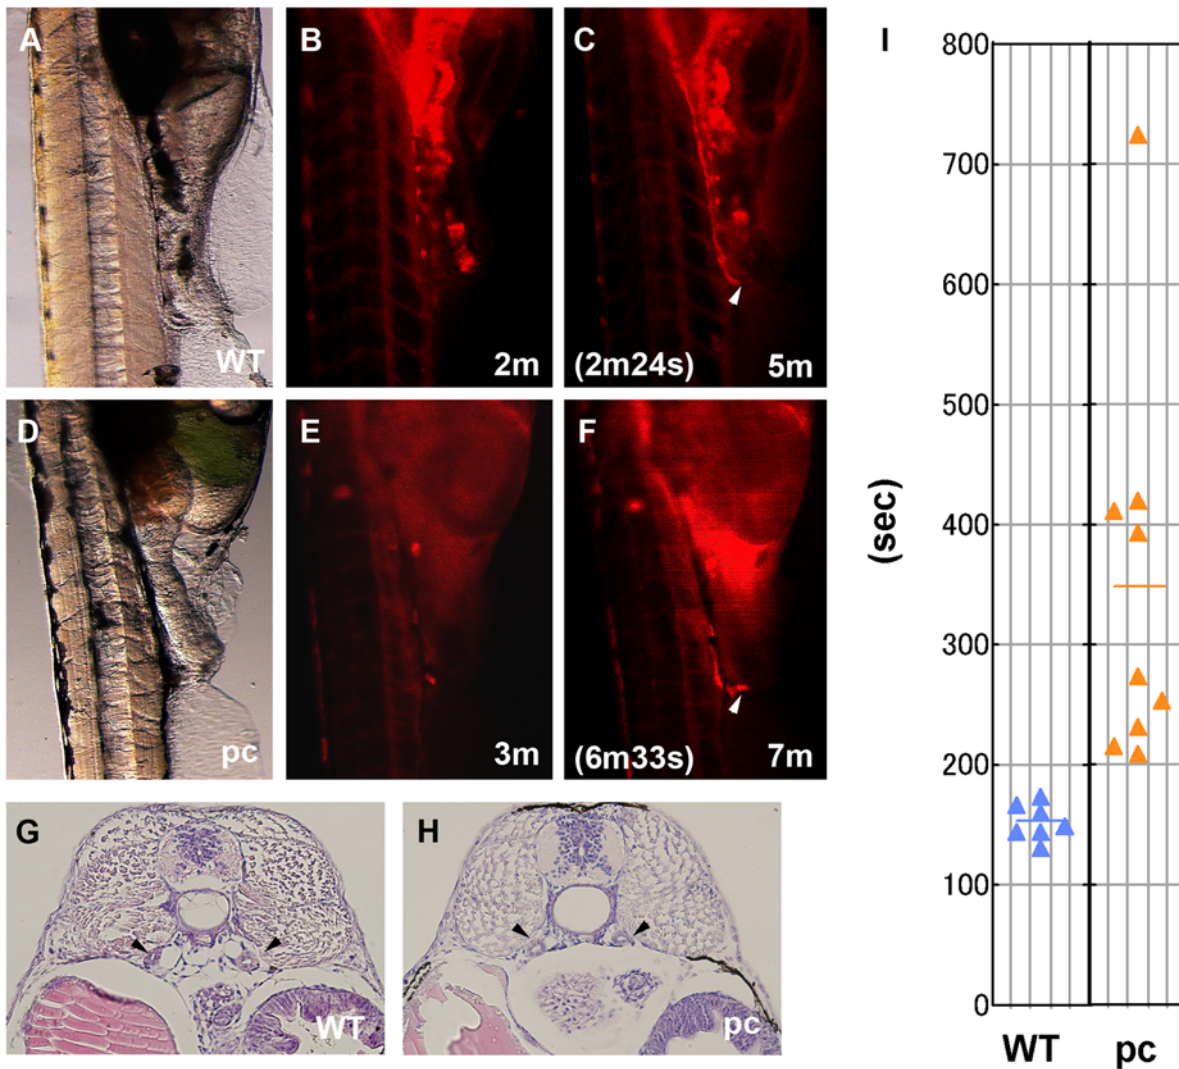

**Figure 5. Urine flow in the pc mutants.** At 10-day postfertilization (dpf), 5% rhodamine-conjugated dextran was injected into the common cardinal vein of medaka fry. The dye was filtered in the pronephric glomera, passed through the pronephric tubules and ducts, and subsequently excreted into the bladder. (A, B, C) Wild-type fry, (D, E, F) pc mutant fry. (A, D) are transmitted light images, (B, E) are fluorescence images obtained before the dye was excreted into the bladder, at 2 min after dye injection in the wild-type and at 3 min after dye injection in the pc mutant. (C, F) Fluorescence images obtained after dye excretion, 5 min after dye injection in the wild-type and 7 min after dye injection in the pc mutant. Arrowheads indicate the positions of dye excretion into the bladder. In the samples shown, dye excretion was first observed at 2 min 24 s in the wild-type and at 6 min 33 s in the pc mutant. (G, H) Cross sections of the trunk region of the fry showing that ductal distension has not yet occurred in the pc mutant and thus cannot be affecting the urine flow rate. Arrowheads indicate the positions of pronephric ducts. (I) The time after injection until first entry of fluorescence into the bladder was  $153.0 \pm 14.7$  s in wild-type fry ( $n = 7$ ) and  $348.0 \pm 164.9$  s in pc mutants ( $n = 9$ ). Time to excretion for each individual is indicated by a triangle (seconds). Horizontal bars show mean values. doi:10.1371/journal.pone.0006299.g005

observed in the wild-type. We also examined the length of the renal cilia by visualization with anti-alpha-tubulin (Fig. 6A, B). We previously reported that the pc mutant had renal cilia in the cystic mesonephros [15]. Although we did not determine the ciliary length in the previous study, the SEM images of the mesonephric cilia were apparently normal in the pc mutant adult fish. Length measurement of the cilia in zebrafish has shown that the cilia in different organs vary in length [13]. We also noticed that the ciliary length differs dependent on segmental positions: the cilia in the pronephric duct are much shorter than those in the tubule (data not shown). In this study, the lengths of the cilia in the tubular portion of the pronephros were compared between the wild-type and the pc mutant fries. Our measurements revealed that the cilia were significantly shorter in pc mutants

( $10.43 \pm 0.21 \mu\text{m}$ ) than in wild-type fish ( $15.28 \pm 0.74 \mu\text{m}$ ) (Fig. 6C). These results implied that the abnormally short cilia in pc mutants were responsible for the relatively decreased rates of urine flow compared to wild-type kidneys, and that this led to the accumulation of urine and distension of the tubules and ducts in the pronephros.

**Proliferation of renal epithelial cells may not be the direct cause of cyst formation**

Cystogenesis in PKD is believed to be closely related to the proliferation of the renal tubular epithelial cells [2,42]. To investigate the possibility that *pc/glis3* is involved in renal tubular cell proliferation, we performed BrdU labeling of medaka embryos



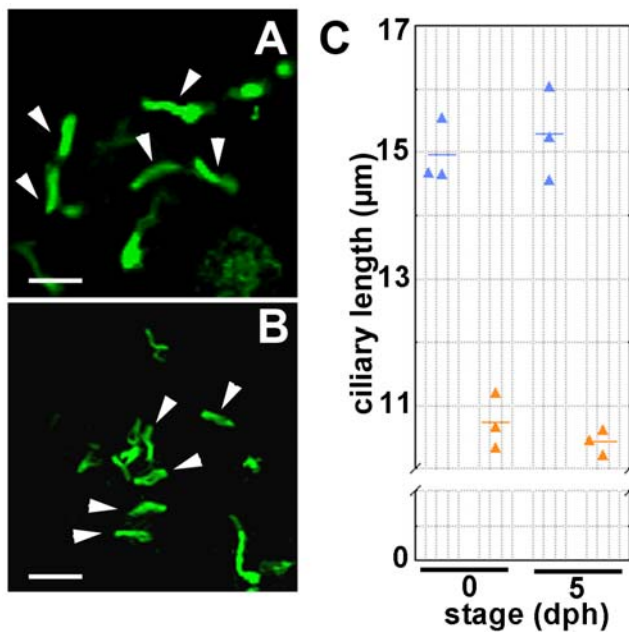

**Figure 6. Length of renal cilia.** The renal cilia of medaka hatchlings were visualized by immunofluorescence analysis using anti-acetylated alpha-tubulin antibody. Confocal fluorescence images of the cilia in tubular segments are shown for (A) wild-type individuals and (B) *pc* mutants. Measurement results of cilia length are shown in (C); the cilia were significantly shorter in *pc* mutants ( $10.73 \pm 0.44 \mu\text{m}$ ,  $n=3$ , at 0dph and  $10.43 \pm 0.21 \mu\text{m}$ ,  $n=3$ , at 5dph, blue triangles) than in the wild-type ( $14.97 \pm 0.51 \mu\text{m}$ ,  $n=3$ , at 0dph and  $15.28 \pm 0.74 \mu\text{m}$ ,  $n=3$ , at 5dph, orange triangles) ( $p < 0.005$ ). Data show the mean lengths for at least 15 cilia in each individual. Horizontal bars show the means of the specimens. Arrowheads indicate examples of cilia measured. Triangles show the mean cilia length ( $\mu\text{m}$ ) for each individual. Scale bars show 20  $\mu\text{m}$ .

doi:10.1371/journal.pone.0006299.g006

and fry. The number of BrdU-positive cells in the tubular or ductal epithelium of the developing pronephros of 4 dpf embryos, as well as in the functional pronephros of 5 dph fry, was counted for a number of sections (Fig. 7). At 4 dpf, before development of the pronephros is complete, both wild-type and *pc* mutant embryos had a number of BrdU-positive cells in the tubular and ductal segments of the developing pronephros. No significant difference in the number of BrdU-positive cells was observed between the wild-type and the *pc* mutant (Fig. 7A, B). However, we detected significant cell proliferation in the pronephric tubules of *pc* mutant fry at 5 dph (Fig. 7D,  $35.8 \pm 3.6$  positive cells in the anterior portion of the pronephros,  $n=4$ ), while there were few proliferating tubular epithelial cells in the pronephros of wild-type fry (Fig. 7C,  $8.0 \pm 4.2$  positive cells,  $n=4$ ). Given that *pc/glis3* expression is specific to the renal tubular cells, it is possible that the *pc/glis3* mutation caused elevated cell proliferation in the renal tubules. However, increased cell proliferation did not precede the occurrence of urine flow reduction in the *pc* mutant, implying that elevated cell proliferation was not the primary phenotype causing cyst formation.

#### *pc/glis3* protein is localized in primary cilia

To further investigate if *pc/glis3* is involved in the function of renal cilia, we examined the localization of the *pc/glis3* protein in renal epithelial cells. For this purpose a GFP-tagged *pc/glis3* construct was introduced into the mouse renal epithelial cell line (Dai1 cells) [36]. *pc/glis3*-GFP fluorescence was observed in a punctuate fashion throughout the entire ciliated region (Fig. 8).

The immunohistochemical signal from acetylated alpha-tubulin almost completely overlapped with the *pc/glis3*-GFP fluorescent signal, suggesting that the *pc/glis3* protein was localized in the cilia. In a large number of cells, *pc/glis3*-GFP fluorescence was also detected in the nucleus, indicating that the nuclear localization signal in the carboxy-terminal domain of *pc/glis3* was functional and that the *pc/glis3* protein preferentially sorts to both the nucleus and the cilia under our experimental conditions.

## Discussion

### A putative role for *pc/glis3* in PKD pathogenesis

In this study, we have shown that a mutation in *pc/glis3* causes PKD in medaka (Fig. 1). *pc/glis3* is continuously expressed in the ciliated epithelial cells of the renal tubule and duct during pronephric and mesonephric development (Fig. 2), and knock-down of *pc/glis3* leads to dilation of the pronephric tubules (Fig. 3). Taken together, these findings indicate that *pc/glis3* is involved in the maintenance and/or regulation of renal tubules.

Numerous previous studies on human and rodent cystic kidney disease have indicated that PKD is a cilia-associated disease [1,2,10,43–51]. In mammals, the cilia on the surface of renal epithelial cells are believed to be immotile, acting merely as mechanosensors of urine flow to maintain the lumen of the renal tubule at an appropriate size. Disturbed ciliary structure or function results in PKD [6,50,52,53]. We previously reported the occurrence of cilia on the surface of the renal tubular and ductal epithelium in medaka [15]. However, unlike the 9+0 arrangement of mammalian renal cilia, the cilia in medaka are organized in a 9+2 arrangement, the same arrangement as that usually found in motile cilia [2,13,15]. In fact, in the present study we found that medaka renal cilia are motile, beating in a circular motion and having an undulating appearance (data not shown). Previous studies on zebrafish PKD mutants have shown that disruption of the structure or motility of cilia results in pronephric cyst formation [2,13]. In the *pc* mutant, renal cilia have been observed in the renal tubules and ducts [15]. Our present data show that cilia were significantly shorter and urine flow rate was reduced in the *pc* mutant. We speculate that the abnormally short cilia of renal epithelial cells may not be able to generate the driving force required for normal rates of urine flow, possibly leading to urine accumulation and subsequent cyst formation. Urine accumulation or cyst formation may cause the secondary phenotype of elevated cell proliferation in the tubular and ductal cells (Fig. 7). Despite the existence of inter-species differences in the architecture and motility of renal cilia, our results indicate that having cilia of sufficient length is crucial for maintaining lumen size in the renal tubules and ducts. Loss of *pc/GLIS3* function in medaka and humans results in renal cyst formation, implying that *GLIS3* is functionally equivalent in these animals.

Further evidence implying a link between the cilia and PKD pathogenesis in medaka *pc* mutants is derived from the analysis of the subcellular localization of the *pc/glis3* protein. Our data show that the EGFP-tagged *pc/glis3* protein was localized in the cilia and the nuclei of mouse renal epithelial cells (Fig. 8). Similarly, Attanasio et al. have recently shown that the *GLIS2* protein is localized in both the cilia and the nuclei in cultured canine kidney (MDCK) cells [41]. Members of the *GLIS* family structurally resemble *Gli* transcription factors, which act downstream of Hedgehog [54]. It has recently been reported that Hedgehog signaling requires cilia for activation of downstream genes [55–62] and that the *Gli* proteins *Gli2* and *Gli3* are localized at the tips of cilia before translocation to the nuclei in response to Hedgehog ligand-receptor binding [62–64]. The similarity between *GLIS*

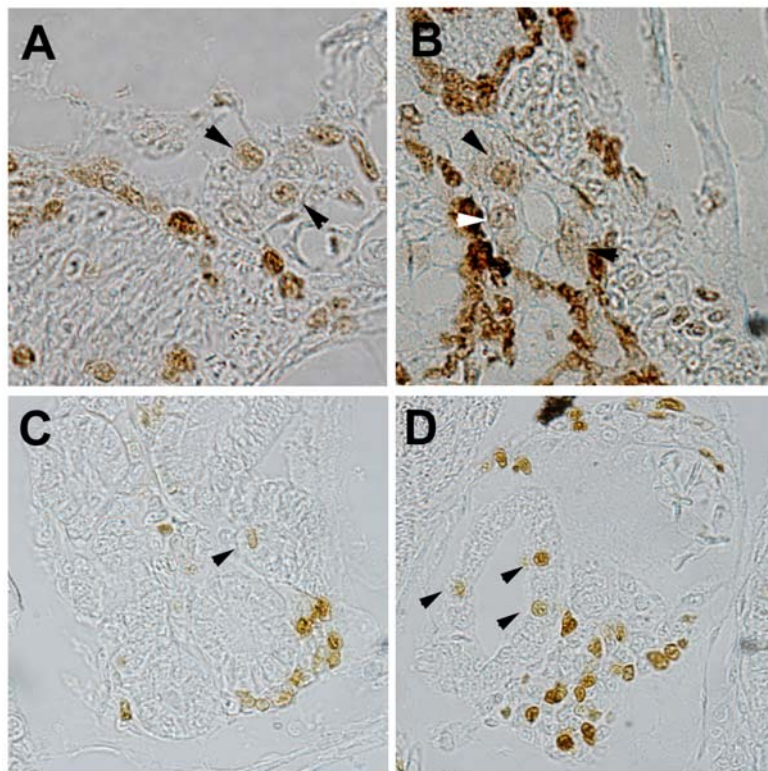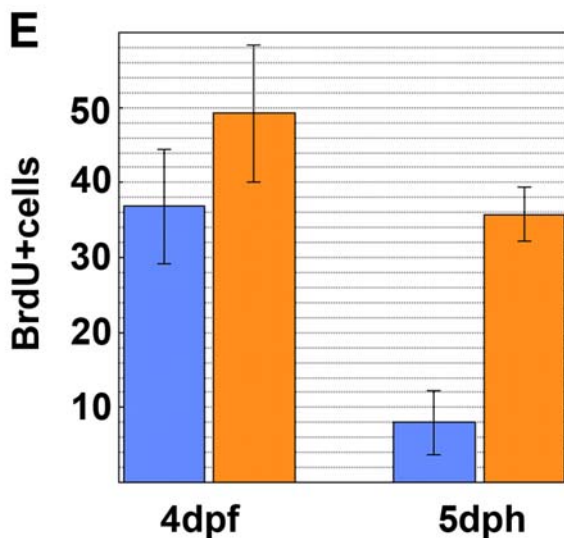

**Figure 7. Cell proliferation in the renal tubules and ducts.** Cell proliferation in the kidney was compared between (A, C) wild-type and (B, D) *pc* mutant medaka at 4-day postfertilization (dpf) (A, B) and 5-day posthatching (dph)(C, D). Arrowheads indicate BrdU-positive cells in the renal ductal or tubular epithelia. (E) Number of BrdU-positive cells in the epithelium of the anterior portion (most anterior 15 sections) of the pronephros. Sections were obtained from four wild-type and four *pc* mutant fry at both 4 dpf and at 5 dph. The number of BrdU-positive cells was significantly different in wild-type (blue) and *pc* mutant (orange) medaka at 5 dph ( $p < 0.005$ ), but not at 4 dpf. doi:10.1371/journal.pone.0006299.g007

and Gli proteins tempts us to speculate that *pc/glis3* is involved in a signal transduction pathway, in a manner similar to Ci/Gli in Hedgehog signaling.

#### Are *pc* mutants really analogous to patients with a *GLIS3* mutation?

In humans and mice, three *GLIS* genes (*GLIS1*, *GLIS2* and *GLIS3*) have been found [38–40,65]. Comparison of the primary structures

of these genes suggests that medaka have two *glis1* counterparts (Fig. S2). By positional cloning, we found that *RFX3* is located in the flanking region of *pc/glis3*. Interestingly, as a result of searching the genome databases of other species, we found that *RFX3* or other *RFX* isoforms, is not adjacent to other members of *glis* family in all species examined (humans, mice, zebrafish and pufferfish). This evolutionary conservation of *pc/glis3* and *RFX3* synteny indicates that *pc/glis3* is equivalent to human and mouse *GLIS3*.

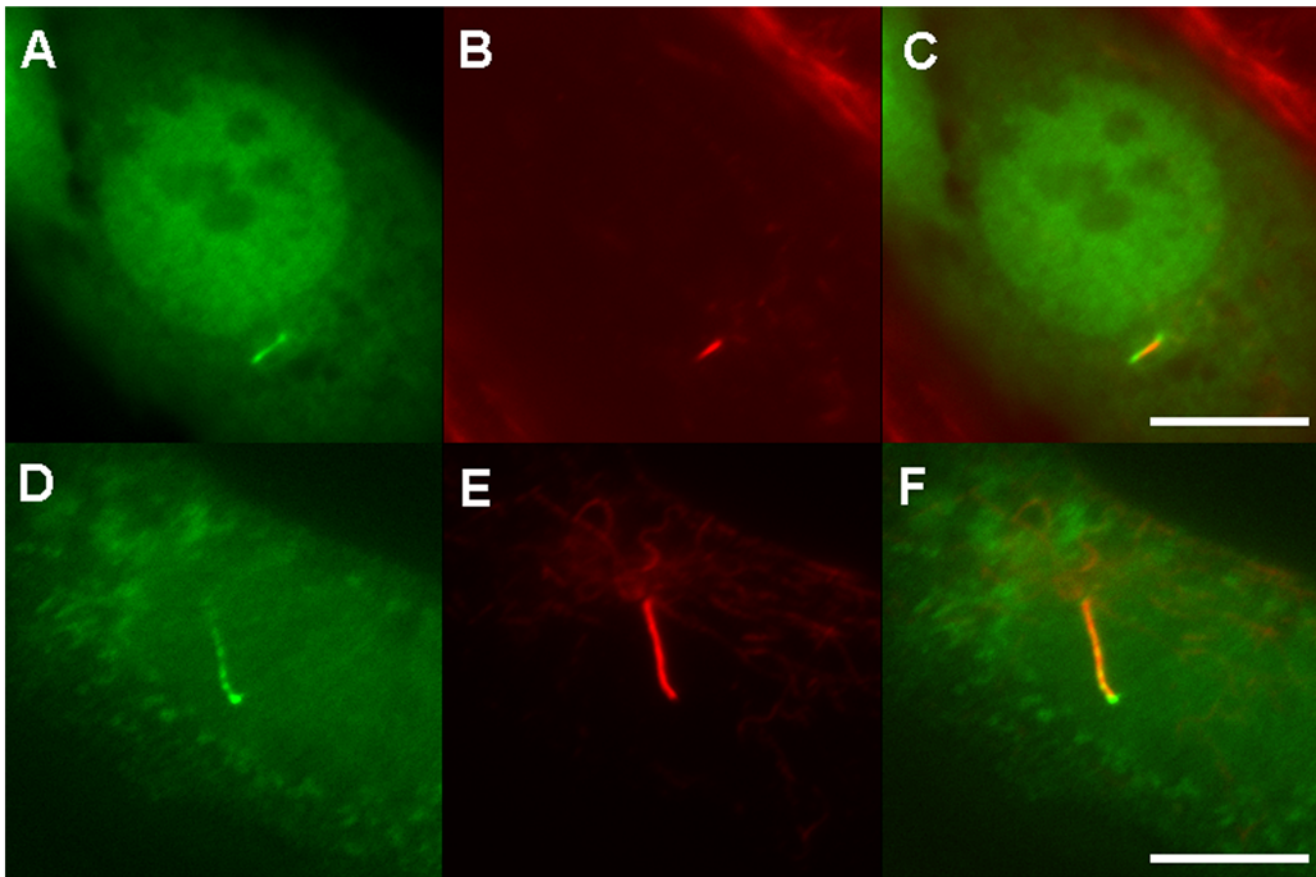

**Figure 8. Subcellular localization of the *pc/glis3* protein.** EGFP-tagged *pc/glis3* protein fluorescence was detected along the entire length of the cilium in mouse cultured renal epithelial cells (A-F). (A, D) EGFP-fluorescence. (B, E) acetylated alpha-tubulin, used as a cilium marker (Alexa555). (C, F) Merged pictures. The *pc/glis3* fluorescent signal was also detected in the nucleus (A, C). Scale bars show 10  $\mu$ m.  
doi:10.1371/journal.pone.0006299.g008

Senee et al. determined that mutations in *GLIS3* are responsible for a rare syndrome with a pleiotropic phenotype that includes neonatal diabetes mellitus, congenital hypothyroidism, and cystic kidney [24]. Three distinct alleles of *GLIS3* are involved in this syndrome [24,66]. One allele, *NDH1*, which harbors a single base pair insertion that causes a frameshift mutation and a truncated protein, cause cystic kidney, while the other two alleles, *NDH2* and *NDH3*, which have large deletions in the *GLIS3*-flanking region, do not. The mutation found in *pc/glis3* of the medaka *pc* mutant was caused by a large transposon inserted at a position corresponding to the second zinc finger, which we predict would result in a defective zinc finger motif and the absence of the C-terminal region (Fig. 1G). Truncation of the C-terminal region of *GLIS3* has also been shown to inhibit its transcriptional promoting activity in vitro [40]. These lines of evidence, together with our results, suggest that the C-terminal domain of *pc/glis3* is crucial for the proper function of this protein in the kidney. Despite the allele-specific manifestation of cyst formation in human patients, our finding that *pc/glis3* causes PKD in medaka has clearly shown that loss of *GLIS3* function can lead to renal cyst formation across species.

Transcripts of *pc/glis3* were observed to be abundantly expressed in the beta cells of medaka in this study. However, no mutant phenotypes were found in the pancreatic tissues of *pc* mutants. Conversely, human *GLIS3* mutations cause neonatal diabetes. Further studies are required to explain the functional

differences in the pancreas between medaka and humans. Notably, there are fundamental differences in the nutritional requirements of humans and fish; for example, amino acids rather than glucose are the most important insulinotropins in fish [67]. Consequently, the pathogenesis of diabetes may differ markedly in mammals and fish. However, if it is assumed that members of the *glis* family have similar activities, the overlapping expression of the different *glis* family members in the pancreas but not in the kidney might preclude the occurrence of pancreatic phenotypes in the *pc* mutant. Ultimately, this difference in phenotype between mammals and medaka would position the *pc* mutant as a kidney-specific disease model of human *GLIS3* mutations.

In conclusion, we identified the medaka *pc* gene, an ortholog of human *GLIS3*, as a gene causing cystic kidney. The protein encoded by the gene is possibly required for normal motility of cilia located on the renal tubular and ductal epithelium and thus also for the generation of normal urine flow in medaka. To better understand the function of *pc/glis3* in the kidney and its role in PKD pathogenesis, comparative studies of the involvement of *pc/glis3* in ciliary motility in fish and ciliary mechanosensitivity in mammals should be undertaken.

### Supporting Information

**Figure S1** Analysis of *pc/glis3* mRNA expression (A) RT-PCR of wild-type (WT, left) and the *pc* mutant (right) *pc/glis3* mRNA.



pc/glis3 mRNA was not detectable in the pc mutant using the PCR primers 5'-GTTTGAAGGCTGCAAGAAGGCATT-3' (sense) and 5'-CTTGCCTAACTGTCGCTCTTG-3' (antisense), which would amplify the 3' region of the transcript (271 bp). RFX3 is a neighboring gene of pc/glis3 and EF-1 $\alpha$  acted as a control. For RFX3 mRNA detection, the PCR primers 5'-CGTTGCGCAGATATACGTCAC-3' (sense) and 5'-AGGCGTCTCTCCAGTAGCTTG-3' (antisense) were used. EF-1 $\alpha$  mRNA detection was conducted as previously described [68]. (B) Northern blot analysis pc/glis3 mRNA was detected in WT kidney but not in pc kidney or WT liver by northern blot analysis using the fragment of glis3 cDNA containing exons 3–6 as a probe. The mRNA was approximately 4 kb in length. The smeared signals in the pc kidney sample may be due to aberrantly spliced RNAs of various lengths. Indeed, we identified numerous RNAs in the pc mutant kidney that have different exons derived from inserted genomic regions. These RNAs contained a variety of 3' pc mutant-specific exons in their 3' tail regions.

Found at: doi:10.1371/journal.pone.0006299.s001 (0.19 MB TIF)

**Figure S2** The sequence of pc/glis3 cDNA and its deduced protein. The pc/glis3 cDNA sequence is shown in the upper line and its deduced amino acid sequence in the lower line. The exon boundaries are indicated by color: the 3' end of the exon in front is in red and the 5' end of the exon behind is in blue. The position of the probe used for northern hybridization is indicated by underlining. The region amplified by RT-PCR (Fig. S1A) is indicated by double-underlining. The region of alternative splicing (73 bp) in exon 3 is shadowed in gray. The two alternative start codons are shadowed in green.

Found at: doi:10.1371/journal.pone.0006299.s002 (0.04 MB DOC)

**Figure S3** The phylogenetic tree constructed for Kruppel-like transcription factors. Shown are pc/glis3 (AB353137), glis1a (AB353139), glis1b (AB353140), and glis2 (AB353141) from medaka; Glis1 (NP\_671754), Glis2 (Q8VLD9), Glis3 (ABI31654), Gli1 (P47806), Gli2 (NP\_001074594), Gli3 (Q61602), Zic1 (AAH6024), Zic2 (Q62520), and Zic3 (Q62521) from the mouse; and Cubitus interruptus (Ci, P19538) from *Drosophila*. The tree

was drawn using the ClustalW program, and was constructed based on the complete amino acid sequence.

Found at: doi:10.1371/journal.pone.0006299.s003 (0.19 MB TIF)

**Figure S4** Structure and expression of pc/glis3 mRNA (A) Structure of the pc/glis3 mRNA. The structure of the WT and pc pc/glis3 mRNA is described in detail in the legend to Fig. 1G. (B) RT-PCR of the 3' region of pc/glis3 mRNA. An exon 4 fragment was amplified from both the WT and pc mutant medaka by RT-PCR with the primer set described in the text and detailed below (a). The 3' region extending over exon 4 and exon 5 was not obtained in the pc mutant (b), although the pc mutant mRNA had a distinct exon 5 that was not detected in WT (c). Primers used: (a) 5'-CACTGCTGCCGATGGATGGACTG-3' / 5'-TTGTTGGCTTCTCTCCAGAATG-3' (b) 5'-CACTGCTGCCGATGGATGGACTG-3' / 5'-CTTGCCTAACTGTCGCTCTCTT-3' (c) 5'-CACTGCTGCCGATGGATGGACTG-3' / 5'-GCCAGACCTGTCTGCTGTGACG-3'

Found at: doi:10.1371/journal.pone.0006299.s004 (0.17 MB TIF)

**Figure S5** RT-PCR of the 3' region of pc/glis3 mRNA (A) The regions targeted for PCR amplification (B) RT-PCR of WT and mutant mRNA (C) Genomic PCR of the regions corresponding to those amplified by RT-PCR. Primers used: (1) 5'-TTTACCACTGGGAAGCAAAGC-3' / 5'-GCATGAAACTCTGCCGTATATC-3' (2) 5'-TGAGTGTTCACAGGCCATC-3' / 5'-CAGCATCTTCTGACTGTGG-3' (3) 5'-TTTGAAGGCTGCAAGAAGGCATT-3' / 5'-AACAACTGTAAAGTGTGTCAG-3' (4) 5'-TTTGAAGGCTGCAAGAAGGCATT-3' / 5'-ATTTGTGCCATGTTCCAAAACAG-3'

Found at: doi:10.1371/journal.pone.0006299.s005 (0.25 MB TIF)

## Acknowledgments

We thank Dr. M. Hibi for critical reading of the manuscript.

## Author Contributions

Conceived and designed the experiments: HH KO AK KN TM TY HH HT YK YW. Performed the experiments: HH RM NW DS CI YK TJ TN KO KN TSI TM. Contributed reagents/materials/analysis tools: SA NS. Wrote the paper: HH.

## References

- Igarashi P, Somlo S (2007) Polycystic kidney disease. *J Am Soc Nephrol* 18: 1371–1373.
- Yoder BK (2007) Role of primary cilia in the pathogenesis of polycystic kidney disease. *J Am Soc Nephrol* 18: 1381–1388.
- Hughes J, Ward CJ, Peral B, Aspinwall R, Clark K, et al. (1995) The polycystic kidney disease 1 (PKD1) gene encodes a novel protein with multiple cell recognition domains. *Nat Genet* 10: 151–160.
- Mochizuki T, Wu G, Hayashi T, Xenophontos SL, Veldhuisen B, et al. (1996) PKD2, a gene for polycystic kidney disease that encodes an integral membrane protein. *Science* 272: 1339–1342.
- Pazour GJ, San Agustin JT, Follit JA, Rosenbaum JL, Witman GB (2002) Polycystin-2 localizes to kidney cilia and the ciliary level is elevated in orpk mice with polycystic kidney disease. *Curr Biol* 12: R378–380.
- Yoder BK, Hou X, Guay-Woodford LM (2002) The polycystic kidney disease proteins, polycystin-1, polycystin-2, polaris, and cystin, are co-localized in renal cilia. *J Am Soc Nephrol* 13: 2508–2516.
- Nauli SM, Alenghat EJ, Luo Y, Williams E, Vassilev P, et al. (2003) Polycystins 1 and 2 mediate mechanosensation in the primary cilium of kidney cells. *Nat Genet* 33: 129–137.
- Nauli SM, Zhou J (2004) Polycystins and mechanosensation in renal and nodal cilia. *Bioessays* 26: 844–856.
- Fischer E, Legue E, Doyen A, Nato F, Nicolas JF, et al. (2006) Defective planar cell polarity in polycystic kidney disease. *Nat Genet* 38: 21–23.
- Singla V, Reiter JF (2006) The primary cilium as the cell's antenna: signaling at a sensory organelle. *Science* 313: 629–633.
- Bisgrove BW, Yost HJ (2006) The roles of cilia in developmental disorders and disease. *Development* 133: 4131–4143.
- Hildebrandt F, Otto E (2005) Cilia and centrosomes: a unifying pathogenic concept for cystic kidney disease? *Nat Rev Genet* 6: 928–940.
- Kramer-Zucker AG, Olale F, Haycraft CJ, Yoder BK, Schier AF, et al. (2005) Cilia-driven fluid flow in the zebrafish pronephros, brain and Kupffer's vesicle is required for normal organogenesis. *Development* 132: 1907–1921.
- Omran H, Kobayashi D, Olbrich H, Tsukahara T, Loges NT, et al. (2008) Ktu/Pf13 is required for cytoplasmic pre-assembly of axonemal dyneins. *Nature* 456: 611–616.
- Mochizuki E, Fukuta K, Tada T, Harada T, Watanabe N, et al. (2005) Fish mesonephric model of polycystic kidney disease in medaka (*Oryzias latipes*) pc mutant. *Kidney Int* 68: 23–34.
- Hostetter CL, Sullivan-Brown JL, Burdine RD (2003) Zebrafish pronephros: a model for understanding cystic kidney disease. *Dev Dyn* 228: 514–522.
- Schottenfeld J, Sullivan-Brown J, Burdine RD (2007) Zebrafish curly up encodes a Pkd2 ortholog that restricts left-side-specific expression of southpaw. *Development* 134: 1605–1615.
- Ohara T, Mangos S, Liu Y, Zhao J, Wiessner S, et al. (2006) Polycystin-2 immunolocalization and function in zebrafish. *J Am Soc Nephrol* 17: 2706–2718.
- Drummond IA (2005) Kidney development and disease in the zebrafish. *J Am Soc Nephrol* 16: 299–304.
- Sun Z, Amsterdam A, Pazour GJ, Cole DG, Miller MS, et al. (2004) A genetic screen in zebrafish identifies cilia genes as a principal cause of cystic kidney. *Development* 131: 4085–4093.
- Marshall WF (2004) Human cilia proteome contains homolog of zebrafish polycystic kidney disease gene qilin. *Curr Biol* 14: R913–914.
- Otto EA, Schermer B, Ohara T, O'Toole JF, Hiller KS, et al. (2003) Mutations in INVS encoding inversin cause nephronophthisis type 2, linking renal cystic disease to the function of primary cilia and left-right axis determination. *Nat Genet* 34: 413–420.



23. Liu S, Lu W, Obara T, Kuida S, Lehoczy J, et al. (2002) A defect in a novel Nek-family kinase causes cystic kidney disease in the mouse and in zebrafish. *Development* 129: 5839–5846.
24. Senec V, Chelala C, Duchatelet S, Feng D, Blanc H, et al. (2006) Mutations in GLIS3 are responsible for a rare syndrome with neonatal diabetes mellitus and congenital hypothyroidism. *Nat Genet* 38: 682–687.
25. Hyodo-Taguchi Y (1996) Inbred strains of the medaka, *Oryzias latipes*. *Fish Biol J Medaka* 8: 11–14.
26. Sakaizumi M, Egami N, Moriwaki K (1983) Allozymic variation and regional differentiation in the wild populations of the fish, *Oryzias latipes*. *Copeia*. pp 311–318.
27. Iwamatsu T (2004) Stages of normal development in the medaka *Oryzias latipes*. *Mech Dev* 121: 605–618.
28. Kimura T, Jindo T, Narita T, Naruse K, Kobayashi D, et al. (2004) Large-scale isolation of ESTs from medaka embryos and its application to medaka developmental genetics. *Mech Dev* 121: 915–932.
29. Matsuda M, Nagahama Y, Shinomiya A, Sato T, Matsuda C, et al. (2002) DMY is a Y-specific DM-domain gene required for male development in the medaka fish. *Nature* 417: 559–563.
30. Kasahara M, Naruse K, Sasaki S, Nakatani Y, Qu W, et al. (2007) The medaka draft genome and insights into vertebrate genome evolution. *Nature* 447: 714–719.
31. Ogoshi M, Inoue K, Naruse K, Takei Y (2006) Evolutionary history of the calcitonin gene-related peptide family in vertebrates revealed by comparative genomic analyses. *Peptides* 27: 3154–3164.
32. Hashimoto H, Rebagliati M, Ahmad N, Muraoka O, Kurokawa T, et al. (2004) The Cerberus/Dan-family protein Charon is a negative regulator of Nodal signaling during left-right patterning in zebrafish. *Development* 131: 1741–1753.
33. Fedorova S, Miyamoto R, Hara da T, Isogai S, Hashimoto H, et al. (2008) Renal glomerulogenesis in medaka fish, *Oryzias latipes*. *Dev Dyn* 237: 2342–2352.
34. Yamagami K (1972) Isolation of a choriolytic enzyme (hatching enzyme) of the teleost, *Oryzias latipes*. *Dev Biol* 29: 343–348.
35. Rupp RA, Snider L, Weintraub H (1994) *Xenopus* embryos regulate the nuclear localization of XMyoD. *Genes Dev* 8: 1311–1323.
36. Shiba D, Yamaoka Y, Hagiwara H, Takamatsu T, Hamada H, et al. (2009) Localization of Inv in a distinctive intraciliary compartment requires the C-terminal ninein-homolog-containing region. *J Cell Sci* 122: 44–54.
37. Kondo S, Kuwahara Y, Kondo M, Naruse K, Mitani H, et al. (2001) The medaka rs-3 locus required for scale development encodes ectodysplasin-A receptor. *Curr Biol* 11: 1202–1206.
38. Kim SC, Kim YS, Jetten AM (2005) Kruppel-like zinc finger protein Gli-similar 2 (Glis2) represses transcription through interaction with C-terminal binding protein 1 (CtBP1). *Nucleic Acids Res* 33: 6805–6815.
39. Kim YS, Lewandoski M, Perantoni AO, Kurebayashi S, Nakanishi G, et al. (2002) Identification of Glis1, a novel Gli-related, Kruppel-like zinc finger protein containing transactivation and repressor functions. *J Biol Chem* 277: 30901–30913.
40. Kim YS, Nakanishi G, Lewandoski M, Jetten AM (2003) GLIS3, a novel member of the GLIS subfamily of Kruppel-like zinc finger proteins with repressor and activation functions. *Nucleic Acids Res* 31: 5513–5525.
41. Attanasio M, Uhlenhaut NH, Sousa VH, O'Toole JF, Otto E, et al. (2007) Loss of GLIS2 causes nephronophthisis in humans and mice by increased apoptosis and fibrosis. *Nat Genet* 39: 1018–1024.
42. Simons M, Walz G (2006) Polycystic kidney disease: cell division without a cue? *Kidney Int* 70: 854–864.
43. Calvet JP (2003) Ciliary signaling goes down the tubes. *Nat Genet* 33: 113–114.
44. Hou X, Mrug M, Yoder BK, Lefkowitz EJ, Kremmidiotis G, et al. (2002) Cystin, a novel cilia-associated protein, is disrupted in the cpk mouse model of polycystic kidney disease. *J Clin Invest* 109: 533–540.
45. Pazour GJ (2004) Intraflagellar transport and cilia-dependent renal disease: the ciliary hypothesis of polycystic kidney disease. *J Am Soc Nephrol* 15: 2528–2536.
46. Saeki H, Kondo S, Morita T, Sasagawa I, Ishizuka G, et al. (1984) Immotile cilia syndrome associated with polycystic kidney. *J Urol* 132: 1165–1166.
47. Tobin JL, Beales PL (2007) Bardet-Biedl syndrome: beyond the cilium. *Pediatr Nephrol* 22: 926–936.
48. Wang S, Luo Y, Wilson PD, Witman GB, Zhou J (2004) The autosomal recessive polycystic kidney disease protein is localized to primary cilia, with concentration in the basal body area. *J Am Soc Nephrol* 15: 592–602.
49. Watnick T, Germino G (2003) From cilia to cyst. *Nat Genet* 34: 355–356.
50. Yoder BK, Tousson A, Millican L, Wu JH, Bugg CE Jr, et al. (2002) Polaris, a protein disrupted in orpk mutant mice, is required for assembly of renal cilium. *Am J Physiol Renal Physiol* 282: F541–552.
51. Zhang MZ, Mai W, Li C, Cho SY, Hao C, et al. (2004) PKHD1 protein encoded by the gene for autosomal recessive polycystic kidney disease associates with basal bodies and primary cilia in renal epithelial cells. *Proc Natl Acad Sci U S A* 101: 2311–2316.
52. Lin F, Hiesberger T, Cordes K, Sinclair AM, Goldstein LS, et al. (2003) Kidney-specific inactivation of the KIF3A subunit of kinesin-II inhibits renal ciliogenesis and produces polycystic kidney disease. *Proc Natl Acad Sci U S A* 100: 5286–5291.
53. Pazour GJ, Dickert BL, Vucica Y, Seeley ES, Rosenbaum JL, et al. (2000) Chlamydomonas IFT88 and its mouse homologue, polycystic kidney disease gene tg737, are required for assembly of cilia and flagella. *J Cell Biol* 151: 709–718.
54. Ingham PW, McMahon AP (2001) Hedgehog signaling in animal development: paradigms and principles. *Genes Dev* 15: 3059–3087.
55. Rohatgi R, Milenkovic L, Scott MP (2007) Patched1 regulates hedgehog signaling at the primary cilium. *Science* 317: 372–376.
56. Jacob L, Lum L (2007) Deconstructing the hedgehog pathway in development and disease. *Science* 318: 66–68.
57. Ainsworth C (2007) Cilia: tails of the unexpected. *Nature* 448: 638–641.
58. Huangfu D, Anderson KV (2006) Signaling from Smo to Ci/Gli: conservation and divergence of Hedgehog pathways from *Drosophila* to vertebrates. *Development* 133: 3–14.
59. Liu A, Wang B, Niswander LA (2005) Mouse intraflagellar transport proteins regulate both the activator and repressor functions of Gli transcription factors. *Development* 132: 3103–3111.
60. Huangfu D, Anderson KV (2005) Cilia and Hedgehog responsiveness in the mouse. *Proc Natl Acad Sci U S A* 102: 11325–11330.
61. Davenport JR, Yoder BK (2005) An incredible decade for the primary cilium: a look at a once-forgotten organelle. *Am J Physiol Renal Physiol* 289: F1159–1169.
62. Corbit KC, Aanstad P, Singla V, Norman AR, Stainier DY, et al. (2005) Vertebrate Smoothed functions at the primary cilium. *Nature* 437: 1018–1021.
63. Haycraft CJ, Banizs B, Aydin-Son Y, Zhang Q, Michaud EJ, et al. (2005) Gli2 and Gli3 localize to cilia and require the intraflagellar transport protein polaris for processing and function. *PLoS Genet* 1: e53.
64. May SR, Ashique AM, Karlen M, Wang B, Shen Y, et al. (2005) Loss of the retrograde motor for IFT disrupts localization of Smo to cilia and prevents the expression of both activator and repressor functions of Gli. *Dev Biol* 287: 378–389.
65. Nakashima M, Tanese N, Ito M, Auerbach W, Bai C, et al. (2002) A novel gene, GliH1, with homology to the Gli zinc finger domain not required for mouse development. *Mech Dev* 119: 21–34.
66. Taha D, Barbar M, Kanaan H, Williamson Balfe J (2003) Neonatal diabetes mellitus, congenital hypothyroidism, hepatic fibrosis, polycystic kidneys, and congenital glaucoma: a new autosomal recessive syndrome? *Am J Med Genet A* 122: 269–273.
67. Andoh T (2007) Amino acids are more important insulinotropins than glucose in a teleost fish, barfin flounder (*Verasper moseri*). *Gen Comp Endocrinol* 151: 308–317.
68. Bubenshchikova E, Kaftanovskaya E, Hattori M, Kinoshita M, Adachi T, et al. (2008) Nuclear transplants from adult somatic cells generated by a novel method using diploidized eggs as recipients in medaka fish (*Oryzias latipes*). *Cloning Stem Cells* 10: 443–452.
